# Supplementary material for: Predictors of Psychological Distress across Three Time Periods during the COVID-19 Pandemic in Poland
Source: MDPI journal article supplement (doi:10.3390/ijerph192215405), 2022-11-21
Supplement: s1 [file s1]

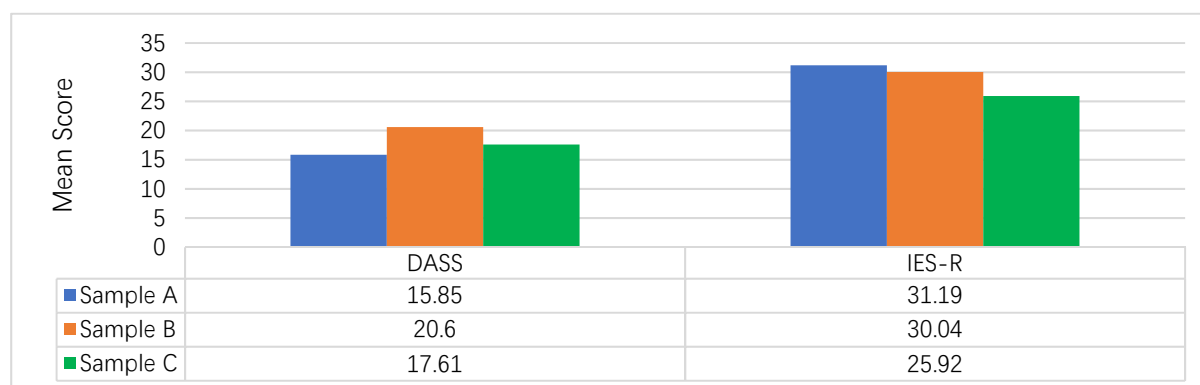

**Figure S1.** Comparison of the mean scores of DASS-stress, anxiety and depression subscales and the IES-R scores between three surveys.

**Table S1.** Comparison of physical symptoms related to COVID-19 and health status between the first, second and third-survey respondents (n =2324).

| Physical symptoms and health status                                 | The first-survey respondents<br>(N = 1064) | The second-survey respondents<br>(N = 557) | The third- survey respondents<br>(N = 703) | Chi-square statistics (X <sup>2</sup> ) | p-value    |
|---------------------------------------------------------------------|--------------------------------------------|--------------------------------------------|--------------------------------------------|-----------------------------------------|------------|
|                                                                     | N (%)                                      | N (%)                                      | N (%)                                      |                                         |            |
| <b>Fever</b>                                                        |                                            |                                            |                                            |                                         |            |
| Yes                                                                 | 40 (3.8)                                   | 50 (9)                                     | 40 (5.7)                                   | 18.862                                  | <0.001***  |
| <b>Cough</b>                                                        |                                            |                                            |                                            |                                         |            |
| Yes                                                                 | 165 (15.5)                                 | 143 (25.7)                                 | 128 (18.2)                                 | 24.992                                  | <0.001***  |
| <b>Chills</b>                                                       |                                            |                                            |                                            |                                         |            |
| Yes                                                                 | 32 (3)                                     | 39 (7)                                     | 43 (6.1)                                   | 15.675                                  | <0.001***  |
| <b>Myalgia</b>                                                      |                                            |                                            |                                            |                                         |            |
| Yes                                                                 | 72 (6.8)                                   | 91 (16.3)                                  | 118 (16.8)                                 | 52.398                                  | <0.001***  |
| <b>Breathing Difficulty</b>                                         |                                            |                                            |                                            |                                         |            |
| Yes                                                                 | 36 (3.4)                                   | 55 (9.9)                                   | 39 (5.5)                                   | 29.172                                  | < 0.001*** |
| <b>Coryza</b>                                                       |                                            |                                            |                                            |                                         |            |
| Yes                                                                 | 266 (25)                                   | 163 (29.3)                                 | 166 (23.6)                                 | 5.584                                   | 0.061      |
| <b>Sore throat</b>                                                  |                                            |                                            |                                            |                                         |            |
| Yes                                                                 | 204 (19.2)                                 | 105 (18.9)                                 | 129 (18.3)                                 | 0.187                                   | 0.911      |
| <b>Fatigue</b>                                                      |                                            |                                            |                                            |                                         |            |
| Yes                                                                 | 301 (28.3)                                 | 254 (45.6)                                 | 366 (52.1)                                 | 110.916                                 | < 0.001*** |
| <b>No complains</b>                                                 |                                            |                                            |                                            |                                         |            |
| Yes                                                                 | 506 (47.6)                                 | 222 (39.9)                                 | 264 (37.6)                                 | 19.709                                  | < 0.001*** |
| <b>Consultation with a doctor in the clinic in the past 14 days</b> |                                            |                                            |                                            |                                         |            |
| Yes                                                                 | 245 (23)                                   | 153 (27.5)                                 | 207 (29.4)                                 | 9.842                                   | 0.007**    |
| <b>Recent hospitalization in the past 14 days</b>                   |                                            |                                            |                                            |                                         |            |
| Yes                                                                 | 18 (1.7)                                   | 16 (2.9)                                   | 10 (1.4)                                   | 3.947                                   | 0.139      |
| <b>Recent quarantine in the past 14 days</b>                        |                                            |                                            |                                            |                                         |            |
| Yes                                                                 | 6 (0.6)                                    | 42 (7.5)                                   | 21 (3)                                     | 61.769                                  | <0.001***  |

|                                                                                   |            |            |            |         |           |
|-----------------------------------------------------------------------------------|------------|------------|------------|---------|-----------|
| <b>Recent testing for COVID-19 in the past 14 days</b>                            |            |            |            |         |           |
| Yes                                                                               | 244 (23)   | 46 (8.3)   | 45 (6.4)   | 116.491 | <0.001*** |
| <b>Current self-rating health status</b>                                          |            |            |            |         |           |
| Very poor/Poor                                                                    | 11 (1)     | 30 (5.4)   | 27 (3.8)   | 42.087  | <0.001    |
| Average                                                                           | 105 (9.9)  | 72 (12.9)  | 109 (15.5) |         |           |
| Good/Very good                                                                    | 948 (89.1) | 455 (81.7) | 567 (80.7) |         |           |
| <b>Chronic illness</b>                                                            |            |            |            |         |           |
| Yes                                                                               | 223 (21)   | 127 (22.8) | 146 (20.8) | 0.937   | 0.626     |
| <b>Close contact with an individual with confirmed infection with COVID-19</b>    |            |            |            |         |           |
| Yes                                                                               | 6 (0.6)    | 130 (23.3) | 109 (15.5) | 227.415 | <0.001*** |
| <b>Indirect contact with an individual with confirmed infection with COVID-19</b> |            |            |            |         |           |
| Yes                                                                               | 16 (1.5)   | 127 (22.8) | 49 (7)     | 221.011 | <0.001*** |
| <b>Contact with an individual with suspected infection with COVID-19</b>          |            |            |            |         |           |
| Yes                                                                               | 76 (7.1)   | 182 (32.7) | 98 (13.9)  | 185.209 | <0.001*** |
| <b>Contact with infected material</b>                                             |            |            |            |         |           |
| Yes                                                                               | 165 (15.5) | 107 (19.2) | 34 (4.8)   | 65.560  | <0.001*** |
| <b>Travel to high-risk countries with COVID-19</b>                                |            |            |            |         |           |
| Yes                                                                               | 29 (2.7)   | 41 (7.4)   | 11 (1.6)   | 34.405  | <0.001*** |

\* p&lt;0.05, \*\*p&lt;0.01, \*\*\*p&lt;0.001.

**Table S2.** Comparison of knowledge and concerns related to COVID-19 between the first, second and third-survey respondents (n =2324).

| Knowledge and concerns related to COVID-19                                                  | The first-survey respondents<br>(N = 1064) | The second-survey respondents<br>(N = 557) | The third-survey respondents<br>(N = 703) | Chi-square statistics (X <sup>2</sup> ) | p-value    |
|---------------------------------------------------------------------------------------------|--------------------------------------------|--------------------------------------------|-------------------------------------------|-----------------------------------------|------------|
|                                                                                             | N (%)                                      | N (%)                                      | N (%)                                     |                                         |            |
| <b>Route of transmission</b>                                                                |                                            |                                            |                                           |                                         |            |
| <b>Droplets</b>                                                                             |                                            |                                            |                                           |                                         |            |
| Yes                                                                                         | 1055 (99.2)                                | 551 (98.9)                                 | 682 (97)                                  | 13.797                                  | 0.001**    |
| <b>Transmitted through touch with infected person</b>                                       |                                            |                                            |                                           |                                         |            |
| Yes                                                                                         | 565 (53.1)                                 | 257 (46.1)                                 | 294 (41.8)                                | 22.619                                  | <0.001***  |
| <b>Contact with contaminated objects</b>                                                    |                                            |                                            |                                           |                                         |            |
| Yes                                                                                         | 903 (84.9)                                 | 420 (75.4)                                 | 459 (65.3)                                | 91.386                                  | <0.001***  |
| <b>Transmitted through food</b>                                                             |                                            |                                            |                                           |                                         |            |
| Yes                                                                                         | 173 (16.3)                                 | 87 (15.6)                                  | 121 (17.2)                                | 0.601                                   | 0.740      |
| <b>Do not know</b>                                                                          |                                            |                                            |                                           |                                         |            |
| Yes                                                                                         | 4 (0.4)                                    | 9 (1.6)                                    | 25 (3.6)                                  | 26.621                                  | <0.001***  |
| <b>Satisfaction with the amount of health information about COVID-19</b>                    |                                            |                                            |                                           |                                         |            |
| Satisfied                                                                                   | 468 (44)                                   | 123 (22.1)                                 | 247 (35.1)                                | 120.122                                 | <0.001***  |
| Not satisfied                                                                               | 204 (19.2)                                 | 221 (39.7)                                 | 151 (21.5)                                |                                         |            |
| Do not know                                                                                 | 392 (36.8)                                 | 213 (38.2)                                 | 305 (43.4)                                |                                         |            |
| <b>How often do you check information regarding the status of the coronavirus pandemic?</b> |                                            |                                            |                                           |                                         |            |
| Several times a day                                                                         | NA                                         | 57 (10.2)                                  | 5 (0.7)                                   | 183.219                                 | < 0.001*** |
| Once a day                                                                                  |                                            | 208 (37.3)                                 | 113 (16.1)                                |                                         |            |
| Once every few days                                                                         |                                            | 192 (34.5)                                 | 267 (38)                                  |                                         |            |
| Difficult to say                                                                            |                                            | 100 (18)                                   | 318 (45.2)                                |                                         |            |
| <b>Do you know what to do if you suspect coronavirus infection?</b>                         |                                            |                                            |                                           |                                         |            |
| Yes                                                                                         | 980 (92.1)                                 | 469 (84.2)                                 | 672 (95.6)                                | 52.510                                  | <0.001***  |
| No                                                                                          | 15 (1.4)                                   | 17 (3.1)                                   | 7 (1)                                     |                                         |            |
| Difficult to say                                                                            | 69 (6.5)                                   | 71 (12.7)                                  | 24 (3.4)                                  |                                         |            |
| <b>Do you follow the news from other countries regarding the</b>                            |                                            |                                            |                                           |                                         |            |

**development and course of the pandemic?**

|              |            |            |            |         |            |
|--------------|------------|------------|------------|---------|------------|
| Yes          | 657 (61.7) | 152 (27.3) | 116 (16.5) | 503.507 | < 0.001*** |
| No           | 46 (4.3)   | 126 (22.6) | 241 (34.3) |         |            |
| Occasionally | 361 (33.9) | 279 (50.1) | 346 (49.2) |         |            |

**Concerns about COVID-19 epidemic****Concerns about lack of healthcare in case of infection with COVID-19**

|     |            |            |            |        |           |
|-----|------------|------------|------------|--------|-----------|
| Yes | 627 (58.9) | 375 (67.3) | 353 (50.2) | 37.745 | <0.001*** |
|-----|------------|------------|------------|--------|-----------|

**Concerns about own health status if infected with COVID-19**

|     |            |            |            |       |        |
|-----|------------|------------|------------|-------|--------|
| Yes | 437 (41.1) | 242 (43.4) | 333 (47.4) | 6.831 | 0.033* |
|-----|------------|------------|------------|-------|--------|

**Concerns about health status of family members if infected with COVID-19**

|     |            |            |          |        |           |
|-----|------------|------------|----------|--------|-----------|
| Yes | 899 (84.5) | 430 (77.2) | 513 (73) | 36.064 | <0.001*** |
|-----|------------|------------|----------|--------|-----------|

**Concerns about likelihood of surviving if infected with COVID-19**

|     |            |            |            |        |         |
|-----|------------|------------|------------|--------|---------|
| Yes | 345 (32.4) | 136 (24.4) | 215 (30.6) | 11.370 | 0.003** |
|-----|------------|------------|------------|--------|---------|

**Concerns about economic impacts of coronavirus**

|     |            |          |            |        |           |
|-----|------------|----------|------------|--------|-----------|
| Yes | 530 (49.8) | 262 (47) | 273 (38.8) | 20.984 | <0.001*** |
|-----|------------|----------|------------|--------|-----------|

**Concerns about unemployment**

|     |            |            |            |       |         |
|-----|------------|------------|------------|-------|---------|
| Yes | 233 (21.9) | 108 (19.4) | 112 (15.9) | 9.609 | 0.008** |
|-----|------------|------------|------------|-------|---------|

**Concerns about incorrect diagnosis of COVID-19**

|     |            |            |            |     |           |
|-----|------------|------------|------------|-----|-----------|
| Yes | 729 (68.5) | 121 (21.7) | 150 (21.3) | 520 | <0.001*** |
|-----|------------|------------|------------|-----|-----------|

**Concerns about extended epidemic of COVID-19**

|     |            |            |            |        |           |
|-----|------------|------------|------------|--------|-----------|
| Yes | 666 (62.6) | 247 (44.3) | 324 (46.1) | 69.541 | <0.001*** |
|-----|------------|------------|------------|--------|-----------|

**Concerns about re-lock-down**

|     |    |    |            |    |    |
|-----|----|----|------------|----|----|
| Yes | NA | NA | 332 (47.2) | NA | NA |
|-----|----|----|------------|----|----|

**No concerns**

|     |          |          |          |        |           |
|-----|----------|----------|----------|--------|-----------|
| Yes | 30 (2.8) | 18 (3.2) | 44 (6.3) | 14.189 | <0.001*** |
|-----|----------|----------|----------|--------|-----------|

\* p&lt;0.05, \*\*p&lt;0.01, \*\*\*p&lt;0.001.

**Table S3.** Comparison of precautionary measures related to COVID-19 between the first, second and third-survey respondents (n =2324).

| Precautionary measures                                                                        | The first-survey<br>respondents<br>(N = 1064) | The second-survey<br>respondents<br>(N = 557) | The third- survey<br>respondents<br>(N = 703) | Chi-square statis-<br>tics (X <sup>2</sup> ) | p-value   |
|-----------------------------------------------------------------------------------------------|-----------------------------------------------|-----------------------------------------------|-----------------------------------------------|----------------------------------------------|-----------|
|                                                                                               | N (%)                                         | N (%)                                         | N (%)                                         |                                              |           |
| <b>Precautionary measures</b>                                                                 |                                               |                                               |                                               |                                              |           |
| <b>Wearing mask and protective gloves</b>                                                     |                                               |                                               |                                               |                                              |           |
| Yes                                                                                           | 303 (28.5)                                    | 506 (90.8)                                    | 599 (85.2)                                    | 851.366                                      | <0.001*** |
| <b>Covering mouth when coughing and sneezing</b>                                              |                                               |                                               |                                               |                                              |           |
| Yes                                                                                           | 791 (74.3)                                    | 418 (75)                                      | 573 (81.5)                                    | 13.247                                       | 0.0014**  |
| <b>Washing hand with soap and water</b>                                                       |                                               |                                               |                                               |                                              |           |
| Yes                                                                                           | 1016 (95.5)                                   | 484 (86.9)                                    | 618 (87.9)                                    | 46.423                                       | <0.001*** |
| <b>Using disinfectants</b>                                                                    |                                               |                                               |                                               |                                              |           |
| Yes                                                                                           | 721 (67.8)                                    | 411 (73.8)                                    | 452 (64.3)                                    | 13.043                                       | 0.0015**  |
| <b>Self-isolating at home</b>                                                                 |                                               |                                               |                                               |                                              |           |
| Yes                                                                                           | 833 (78.3)                                    | 198 (35.5)                                    | 199 (28.3)                                    | 513.267                                      | <0.001*** |
| <b>Eating healthy</b>                                                                         |                                               |                                               |                                               |                                              |           |
| Yes                                                                                           | 547 (51.4)                                    | 252 (45.2)                                    | 342 (48.6)                                    | 5.645                                        | 0.059     |
| <b>Social distancing</b>                                                                      |                                               |                                               |                                               |                                              |           |
| Yes                                                                                           | 817 (76.8)                                    | 278 (49.9)                                    | 196 (27.9)                                    | 419.470                                      | <0.001*** |
| <b>Not applicable</b>                                                                         |                                               |                                               |                                               |                                              |           |
| Yes                                                                                           | 16 (1.5)                                      | 16 (2.9)                                      | 23 (3.3)                                      | 6.538                                        | 0.038*    |
| <b>Wearing a mask regardless of the presence or absence of symptoms</b>                       |                                               |                                               |                                               |                                              |           |
| Yes                                                                                           | 371 (34.9)                                    | 519 (93.2)                                    | 618 (87.9)                                    | 780.035                                      | <0.001*** |
| <b>Are you convinced of the need to wear a mask?</b>                                          |                                               |                                               |                                               |                                              |           |
| Yes                                                                                           | NA                                            | 393 (70.6)                                    | 466 (66.3)                                    | 2.611                                        | 0.106     |
| <b>How much are you convinced about the effectiveness of the mask as a protective measure</b> |                                               |                                               |                                               |                                              |           |
| Fully convinced                                                                               |                                               | 159 (28.5)                                    | 141 (20.1)                                    | 14.242                                       | 0.007**   |
| Fairly convinced                                                                              |                                               | 152 (27.3)                                    | 220 (31.3)                                    |                                              |           |
| Somewhat convinced                                                                            | NA                                            | 126 (22.6)                                    | 160 (22.8)                                    |                                              |           |
| Fairly unconvinced                                                                            |                                               | 56 (10.1)                                     | 94 (13.4)                                     |                                              |           |
| Completely unconvinced                                                                        |                                               | 64 (11.5)                                     | 88 (12.5)                                     |                                              |           |
| <b>Average number of hours staying at home per day to avoid COVID-19</b>                      |                                               |                                               |                                               |                                              |           |
| 20-24 hours                                                                                   | 695 (65.3)                                    | 220 (39.5)                                    | 192 (27.3)                                    | 278.314                                      | <0.001*** |
| 10-19 hours                                                                                   | 279 (26.2)                                    | 223 (40)                                      | 324 (46.1)                                    |                                              |           |
| 0-9 hours                                                                                     | 90 (8.5)                                      | 114 (20.5)                                    | 187 (26.6)                                    |                                              |           |
| <b>I am vaccinated against COVID-19</b>                                                       |                                               |                                               |                                               |                                              |           |
| Yes                                                                                           | NA                                            | NA                                            | 559 (79.5)                                    | NA                                           | NA        |

\* p&lt;0.05, \*\*p&lt;0.01, \*\*\*p&lt;0.001.
